# Supplementary material for: Merge and separation of NuA4 and SWR1 complexes control cell fate plasticity in Candida albicans
Source: PubMed Central journal article supplement (PMC6089883; doi:10.1038/s41421-018-0043-0), 2018-08-14
Supplement: 41421_2018_43_MOESM1_ESM.pdf [file 41421_2018_43_MOESM1_ESM.pdf]

## Supplementary materials

**Table S1. *Candida albicans* strains used in this study**

**Table S2. Plasmids used in this study**

**Table S3. Primers used in this study**

**Figure S1. Cell morphology of *yaf9* or *swr1* mutants and revertants.** The strains were cultured overnight at 25 °C in YPD (up panels), and induced in YPD (middle panels) or YPD with 10% serum (down panels) at 37 °C for 3 hrs. Cell-morpha were observed and photographed.

**Figure S2. Functional analysis of Eaf1 K173 mutants. (a)** Effects of K to R, to Q, to N, or to H mutation at residue 173 of Eaf1 on Yaf9-Eaf1 interaction. HA tagged Eaf1, Eaf1<sup>K173R</sup>, Eaf1<sup>K173Q</sup>, Eaf1<sup>K173N</sup> or Eaf1<sup>K173H</sup> was co-expressed with Yaf9-myc, and cultured in YPD at 25 °C for Co-IP. **(b)** Cell morphology of wild-type, *eaf1*<sup>K173A</sup>, *eaf1*<sup>K173N</sup>, *eaf1*<sup>K173H</sup>, *eaf1* mutants and *eaf1* revertant. Overnight cultured cells were inoculated into YPD and cultured at 37 °C with or without serum for 3 hrs.

**Figure S3. The role of auto-acetylation of Esa1 during hyphal development. (a)** Sequence comparison of regions around auto-acetylated lysine residue of *C. albicans* Esa1 (CaEsa1) and *S. cerevisiae* Esa1 (ScEsa1). **(b)** CaEsa1 is auto-acetylated at lysine 296. Cells carrying Esa1-Myc or Esa1<sup>K296R</sup>-Myc were cultured in YPD at 25 °C and the WCEs were collected, immunoprecipitated with anti-Myc, and probed with anti-Ac-K. **(c)** The Eaf1 acetylation was abolished in *esa1*<sup>K296R</sup> mutant, but enhanced in *esa1*<sup>K296Q</sup> mutant. Eaf1-Myc was introduced into cells of wild-type, *esa1*, *esa1*<sup>K296R</sup>, and *esa1*<sup>K296Q</sup> mutant, cultured in YPD at 25 °C or in YPD plus 10% serum at 35 °C for Co-IP or IB. **(d)** The Esa1<sup>K296R</sup> mutant blocks hyphal initiation, while the Esa1<sup>K296Q</sup> mutant inhibits hyphal elongation. The cells of wild-type, *esa1*, *esa1*<sup>K296R</sup>, *esa1*<sup>K296Q</sup>, and *hda1* mutant were cultured in YPD at 25 °C for 6 hrs or in YPD plus 10% serum at 35 °C for 3 hrs, observed by microscopy.

**Figure S4. Cell morphology of Eaf1<sup>K173R</sup>, Eaf1<sup>K173Q</sup> and *brg1* carrying Eaf1<sup>K173R</sup> mutant induced in different media.** An overnight culture of wild-type, Eaf1<sup>K173R</sup>, Eaf1<sup>K173Q</sup>, *brg1* and *brg1* carrying Eaf1<sup>K173R</sup> was induced at 37 °C in YPD for 3 hrs, YPD with 10% serum for 3 hrs, YPD with 5 nM rapamycin for 4 hrs, YEP with 2% GlcNAc for 4 hrs or Lee's with 2% mannitol for 6 hrs. Cell-morpha were observed and photographed.

**Figure S5. Sequence alignment around the acetylatable lysine in Eaf1**

**orthologues across eukaryotes.** The acetylatable residue K173 is conserved in Eaf1 orthologues among polymorphic fungi, but is occupied by a non-acetylatable residue arginine (R) in non-dimorphic yeast-like fungi or glutamine (Q) in filamentous fungi. The lysine residue is neither conserved among Eaf1 orthologues from protista, nor the Eaf1 orthologues from higher eukaryotes or p400-like proteins.

**Figure S1**

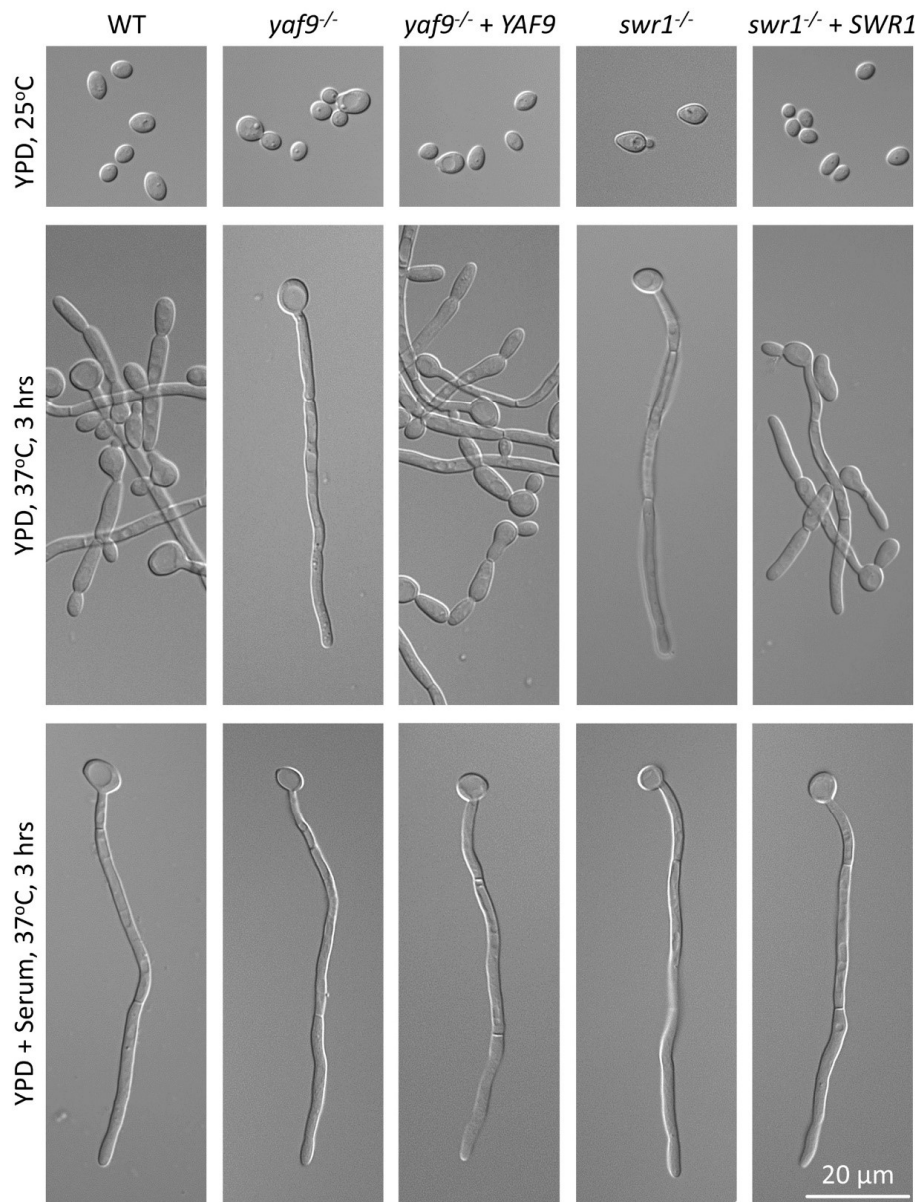

Figure S2

**a**

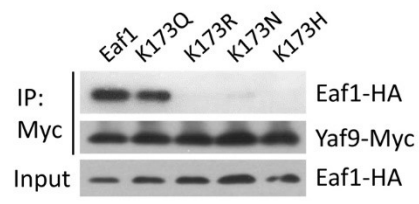

**b**

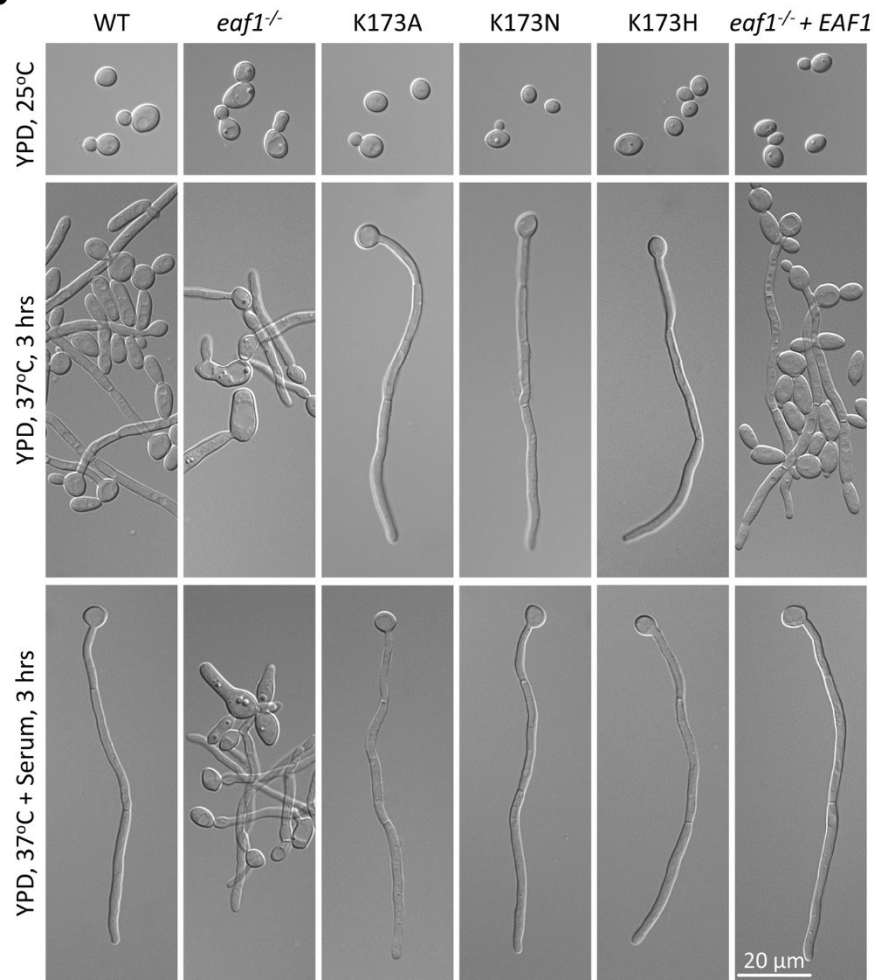

**Figure S3**

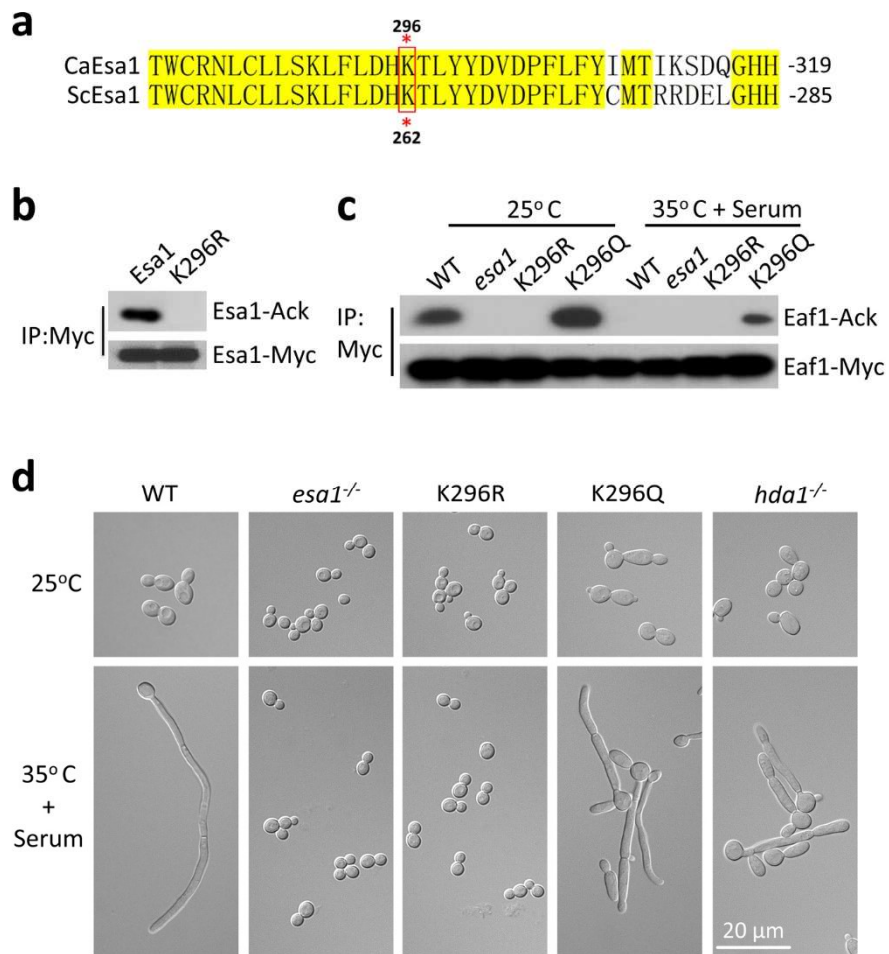

**Figure S4**

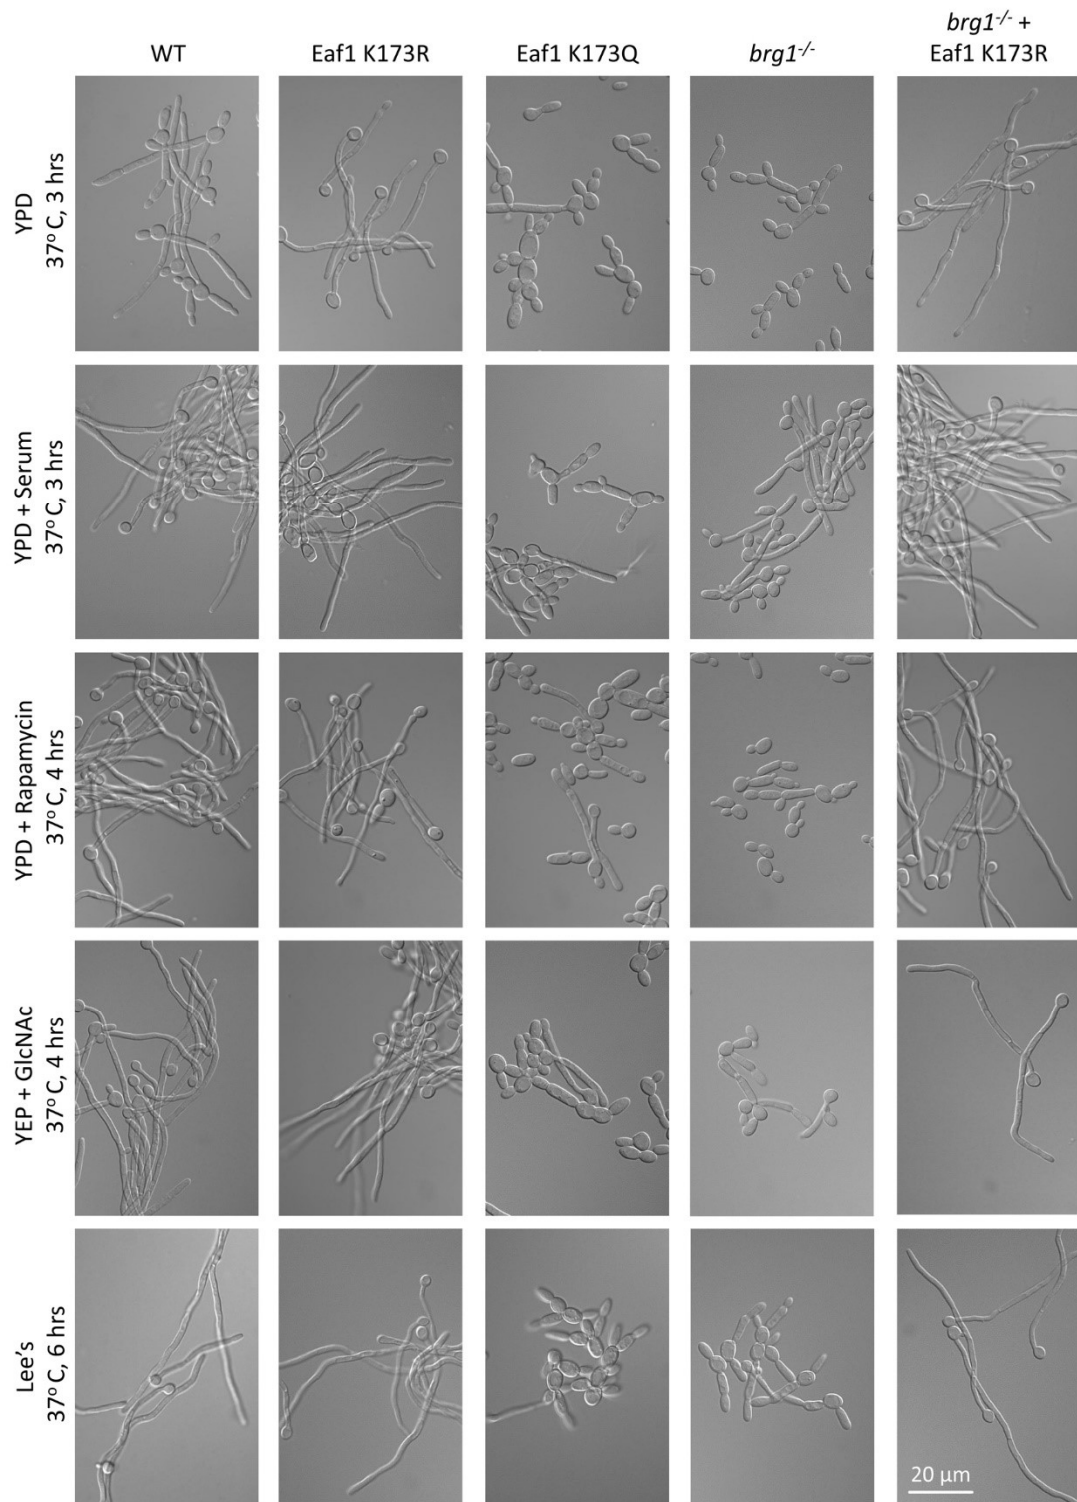



Figure S5

|                   |                                      |                                                              |
|-------------------|--------------------------------------|--------------------------------------------------------------|
| Polymorphic fungi | <i>Candida albicans</i>              | SHK. VLMTENFESA. LAEGKI. AVLYSRIEELKRQGWSLRQPQKFYD           |
|                   | <i>Candida dubliniensis</i>          | SHK. VLMTENFESA. LAEGKI. AVLYSRIEELKRQGWSLRQPQKFYD           |
|                   | <i>Spathaspora passalidarum</i>      | SHK. VLMTENYESA. LLEGKI. AVLYSRIEELKRQGWSLRQPQKFYD           |
|                   | <i>Candida tropicalis</i>            | CHK. VLMTDNFESA. LAEGKI. AVLYSRIEELKRQGWSLRQPSKFYD           |
|                   | <i>Scheffersomyces stipitis</i>      | SHK. VLMTDNFESA. LLEGKI. AVLYSRIEELKRQGWSLRQPSKFYD           |
|                   | <i>Candida krusei</i>                | AHKT. LTTDAFE. ASLIEGKVS. VLHSRIEELKRKNSWSLRQPRKLV           |
| Yeast-like fungi  | <i>Saccharomyces cerevisiae</i>      | AHK. ALTT. NIINNALNEARITVVG. SRIEELRRLGLWSLRQPKRFID          |
|                   | <i>Candida glabrata</i>              | AHK. VLT. SDMINQALHESRITVVS. SRIEELRRSGLWSLRQPKRFVD          |
|                   | <i>Kluyveromyces marxianus</i>       | SQK. ALTT. DLINTALNEGRIIVVA. SRIEELRRLNLWSLRQPKKFID          |
|                   | <i>Cryptococcus neoformans</i>       | SSKCVL. TCD. WKVAMDEM. RH. VRAMERIEAKKAENRWSLRQPKKARG        |
|                   | <i>Ustilago maydis</i>               | ADKC. LMTSD. WRVAFNEQRF. VRAMARIEKLAQGEWSFRQPKKQKG           |
|                   | <i>Schizosaccharomyces pombe</i>     | AHKYVL. . SDNWSHAYREXRQSLH. HLTV. A. KEKGIWSFRQPKRQNE        |
| Filamentous fungi | <i>Coccidioides immitis</i>          | AHKT. L. STANHMTDYAE. QANTRTLKRLYQLQHSGRWPLRQLQRSPE          |
|                   | <i>Blastomyces dermatitidis</i>      | AHKT. L. TTANHFVEYQE. QMDCRSLKRIYQLQHNRWPLRQLQRSAE           |
|                   | <i>Paracoccidioides brasiliensis</i> | AHKT. L. TTANHFVEYQE. QMDCRSLKRIYQLQHNRWPLRQLQRSAE           |
|                   | <i>Histoplasma capsulatum</i>        | AHKT. L. TTANHFVEYQE. QMGCRLKRIYQLQHNRWPLRQLQRSTE            |
|                   | <i>Talaromyces marneffei</i>         | AHKT. L. STSNHLLLEYQE. QMDCRTLRRRIYALQNNRWPLRQLQRSVE         |
|                   | <i>Aspergillus fumigatus</i>         | AHKT. L. TTSNHLLLEYQE. QMDCRTLRRRIYALQNNRWPLRQLKRSVE         |
|                   | <i>Fusarium graminearum</i>          | ANKTV. . TTPDANLATQDHOA. CKVLRVVYHLQHQDKWSLRQPKRCPE          |
|                   | <i>Metarhizium ansopliae</i>         | ANKTI. A. TPDADIVIRDHOA. CKVLRVVYHLQHQDKWSLRQLKRCPE          |
| Fungi-like        | <i>Phytophthora infestans</i>        | A. KTHMTYIVSAGKRARSAMT. SSTAEDAD. . KSST. WSLREAAFRDL        |
|                   | <i>Phytophthora nicotianae</i>       | A. KTHMTYIVSAGKRARSAMTPSS. AECAD. . KSST. WSLREAAFRDL        |
|                   | <i>Phytophthora parasitica</i>       | A. KTHMTYIVSAGKRARSAMTPSS. AECAD. . KSST. WSLREAAFRDL        |
|                   | <i>Plasmopara halstedii</i>          | A. KSRLTYIVSAGKRARSAMT. SSSVASTDSGKSS. IWSFHAAFRDL           |
| Metazoa           | <i>Homo sapiens</i>                  | NATSSQDSSQDTLTE. QITL. ENQVHQRIAEELRKAGLWSQRRLPKLQE          |
|                   | <i>Mus musculus</i>                  | NAASSQDGSQDKLAE. QITL. ENQIHQRIADLRKEGLWSLRRLPKLQE           |
|                   | <i>Danio rerio</i>                   | N. . . SQESSQDKQAE. QAKL. ESHVHQRIAEELRKEGQWSASRLPKLQE       |
|                   | <i>Strongylocentrotus purpuratus</i> | AVYDYTIGSQEMIVE. RAKQ. EAQVMQRIAEELRRDGLWSAKRLPRVQE          |
|                   | <i>Caenorhabditis elegans</i>        | SVLPSCGGGETN. VE. RAAKREAHVLARIAEELRKNGLWSNSRLPKCVE          |
|                   | <i>Drosophila melanogaster</i>       | GGGSGTPNSA. AQ. EXKAKQ. EYVVMQRISELQREGLWTERRLPKLQE          |
| Plants            | <i>Arabidopsis thaliana</i>          | Eaf1 KEDATLEEARI IQAKKKRIAELSCGTAPVEV. REKSQWDFVLEEMAWL      |
|                   |                                      | Pie1 K. SKPDNESRA. . . . KRQKTLE. . . APKEPRRPKTHWDHVLEEMAWL |
| Protozoa          | <i>Tetrahymena thermophila</i>       | RLIEKL. YMERP. QYPFATNVRSLSTNPKVFIQHVLDKVL KEVYWR            |
|                   | <i>Cryptosporidium parvum</i>        | . MLNRL. YMAEKALSILRSGNAIPYPEPQGSVRSQWDFLL QEMTWM            |
|                   | <i>Acanthamoeba castellanii</i>      | WVQGRV GALQREGLWSGRRAGKVP. PRG. . KTHWDYVL EEMAWM            |
| Protophyta        | <i>Micromonas pusilla</i>            | AETIARAKAIKDSKAVLGAKIAAGPYGSANRRKSHWDYVIVEMRWM               |
|                   | <i>Ectocarpus siliculosus</i>        | TKAFKDVRARLRLVLERKPRILP. PVKPPRRRKTLDWDFLLDEMRLI             |

**Table S1. *Candida albicans* strains used in this study**

| Strain | Genotype                                                                                                         | Source     |
|--------|------------------------------------------------------------------------------------------------------------------|------------|
| SC5314 | Wild type                                                                                                        | 1          |
| CAI4   | <i>ura3::λ imm434/ura3::λ imm434</i>                                                                             | 1          |
| BWP17  | <i>ura3::λimm434/ura3::λ imm434 his1::hisG/his1::hisG arg4::hisG/arg4::hisG</i>                                  | 2          |
| CWX1   | <i>ura3::λimm434/ura3::λimm434 his1::hisG/his1::hisG arg4::hisG/arg4::hisG ESA1/esa1::HIS1</i>                   | 3          |
| CWX2   | <i>ura3::λimm434/ura3::λ imm434 his1::hisG/his1::hisG arg4::hisG/arg4::hisG esa1::HIS1/esa1 ::hisG-URA3-hisG</i> | 3          |
| CWX3   | <i>ura3::λimm434/ura3::λ imm434 his1::hisG/his1::hisG arg4::hisG/arg4::hisG esa1::HIS1/esa1 ::hisG</i>           | 3          |
| CLY3   | <i>ura3::λ imm434/ura3::λ imm434 yng2:: hisG /yng2::hisG-URA3-hisG</i>                                           | 4          |
| CLY4   | <i>ura3::λ imm434/ura3::λ imm434 yng2:: hisG /yng2::hisG</i>                                                     | 4          |
| CWX10  | <i>ura3::λimm434/ura3::λimm434 his1::hisG/his1::hisG arg4::hisG/arg4::hisG SWR1/swr1::HIS1</i>                   | This study |
| CWX11  | <i>ura3::λimm434/ura3::λimm434 his1::hisG/his1::hisG arg4::hisG/arg4::hisG swr1::HIS1/swr1 ::hisG-URA3-hisG</i>  | This study |
| CWX12  | <i>ura3::λimm434/ura3::λimm434 his1::hisG/his1::hisG arg4::hisG/arg4::hisG swr1::HIS1/swr1 ::hisG</i>            | This study |
| CWX13  | <i>ura3::λimm434/ura3::λimm434 his1::hisG/his1::hisG arg4::hisG/arg4::hisG EAF1/eaf1::HIS1</i>                   | This study |
| CWX14  | <i>ura3::λimm434/ura3::λimm434 his1::hisG/his1::hisG arg4::hisG/arg4::hisG eaf1::HIS1/eaf1 ::hisG-URA3-hisG</i>  | This study |
| CWX15  | <i>ura3::λimm434/ura3::λimm434 his1::hisG/his1::hisG arg4::hisG/arg4::hisG eaf1::HIS1/eaf1 ::hisG</i>            | This study |
| CSC1   | <i>ura3::λimm434/ura3::λimm434 his1::hisG/his1::hisG arg4::hisG/arg4::hisG eaf7::HIS1/eaf7 ::ARG4</i>            | 4          |
| CWX16  | <i>ura3::λimm434/ura3::λimm434 his1::hisG/his1::hisG arg4::hisG/arg4::hisG bdf1::HIS1/bdf1 ::hisG-URA3-hisG</i>  | This study |
| CWX17  | <i>ura3::λimm434/ura3::λimm434 his1::hisG/his1::hisG arg4::hisG/arg4::hisG bdf1::HIS1/bdf1 ::hisG</i>            | This study |
| CWX18  | <i>ura3::λimm434/ura3::λimm434 his1::hisG/his1::hisG arg4::hisG/arg4::hisG YAF9/yaf9::HIS1</i>                   | This study |
| CWX19  | <i>ura3::λimm434/ura3::λimm434 his1::hisG/his1::hisG arg4::hisG/arg4::hisG yaf9::HIS1/yaf9 ::hisG-URA3-hisG</i>  | This study |
| CWX20  | <i>ura3::λimm434/ura3::λimm434 his1::hisG/his1::hisG arg4::hisG/arg4::hisG yaf9::HIS1/yaf9 ::hisG</i>            | This study |
| CWX21  | <i>ura3::λimm434/ura3::λimm434 his1::hisG/his1::hisG arg4::hisG/arg4::hisG htz1::HIS1/htz1 ::hisG-URA3-hisG</i>  | This study |
| CWX22  | <i>ura3::λimm434/ura3::λimm434 his1::hisG/his1::hisG arg4::hisG/arg4::hisG htz1::HIS1/htz1 ::hisG</i>            | This study |
| CWX23  | <i>ura3::λimm434/ura3::λimm434 his1::hisG/his1::hisG arg4::hisG/arg4::hisG</i>                                   | This study |



|             |                                                                                                                                                                 |            |
|-------------|-----------------------------------------------------------------------------------------------------------------------------------------------------------------|------------|
|             | <i>hda1::HIS1/hda1 ::hisG-URA3-hisG</i>                                                                                                                         |            |
| CWX24       | <i>ura3::λimm434/ura3::λimm434 his1::hisG/his1::hisG arg4::hisG/arg4::hisG</i><br><i>hda1::HIS1/hda1 ::hisG</i>                                                 | This study |
| CWX25       | <i>ura3::λimm434/ura3::λimm434 his1::hisG/his1::hisG arg4::hisG/arg4::hisG</i><br><i>rpd3::HIS1/rpd3::hisG-URA3-hisG</i>                                        | This study |
| CWX26       | <i>ura3::λimm434/ura3::λimm434 his1::hisG/his1::hisG arg4::hisG/arg4::hisG</i><br><i>rpd3::HIS1/rpd3::hisG</i>                                                  | This study |
| CWX27       | <i>ura3::λimm434/ura3::λimm434 his1::hisG/his1::hisG arg4::hisG/arg4::hisG</i><br><i>rpd31::HIS1/rpd31::hisG-URA3-hisG</i>                                      | This study |
| CWX28       | <i>ura3::λimm434/ura3::λimm434 his1::hisG/his1::hisG arg4::hisG/arg4::hisG</i><br><i>rpd31::HIS1/rpd31::hisG</i>                                                | This study |
| CWX29       | <i>ura3::λimm434/ura3::λimm434 his1::hisG/his1::hisG arg4::hisG/arg4::hisG</i><br><i>eaf1::HIS1/eaf1<sup>K173R</sup> ::URA3</i>                                 | This study |
| CWX30       | <i>ura3::λimm434/ura3::λimm434 his1::hisG/his1::hisG arg4::hisG/arg4::hisG</i><br><i>eaf1::HIS1/ eaf1<sup>K173Q</sup> ::URA3</i>                                | This study |
| CWX31       | <i>ura3::λimm434/ura3::λimm434 his1::hisG/his1::hisG arg4::hisG/arg4::hisG</i><br><i>eaf1::HIS1/eaf1<sup>K489R</sup> ::URA3</i>                                 | This study |
| CWX32       | <i>ura3::λimm434/ura3::λimm434 his1::hisG/his1::hisG arg4::hisG/arg4::hisG</i><br><i>eaf1::HIS1/EAF1-YAF9::URA3</i>                                             | This study |
| CWX33       | <i>ura3::λimm434/ura3::λimm434 his1::hisG/his1::hisG arg4::hisG/arg4::hisG</i><br><i>yaf9::HIS1/yaf9 dYEATS::URA3</i>                                           | This study |
| CWX34       | <i>ura3::λimm434/ura3::λimm434 his1::hisG/his1::hisG arg4::hisG/arg4::hisG</i><br><i>esa1::HIS1/esa1<sup>K296R</sup> ::URA3</i>                                 | This study |
| CWX35       | <i>ura3::λimm434/ura3::λimm434 his1::hisG/his1::hisG arg4::hisG/arg4::hisG</i><br><i>esa1::HIS1/ esa1<sup>K296Q</sup> ::URA3</i>                                | This study |
| <i>brg1</i> | <i>his1/his1 leu2/leu2 arg4/arg4 URA3/ura3::λimm434 IRO1/iro1::λimm434</i><br><i>brg1::CdHIS1/brg1::CmLEU2</i>                                                  | 5          |
| CWX36       | <i>his1/his1 leu2/leu2 arg4/arg4 ura3::λimm434/ura3::λimm434 IRO1/</i><br><i>iro1::λimm434 brg1::CdHIS1/brg1::CmLEU2 eaf1::hisG/eaf1<sup>K173R</sup> ::URA3</i> | This study |

**Table S2. Plasmids used in this study**

| <b>Plasmid</b>      | <b>Description</b>                                                                                                                                        | <b>Source</b> |
|---------------------|-----------------------------------------------------------------------------------------------------------------------------------------------------------|---------------|
| pCUB6               | Replacement of <i>S. cerevisiae</i> <i>URA3</i> by <i>C. albicans</i> <i>URA3</i> in pNKY50                                                               | <sup>2</sup>  |
| pSWR1-KO            | 0.50 kb and 0.55 kb KO fragments of <i>C. albicans</i> <i>SWR1</i> and <i>hisG-URA3-hisG</i> in pBluescript SK(+)                                         | This study    |
| pEAF1-KO            | 0.53 kb and 0.6 kb KO fragments of <i>C. albicans</i> <i>EAF1</i> and <i>hisG-URA3-hisG</i> in pBluescript SK+                                            | This study    |
| pYAF9-KO            | 0.55 kb and 0.50 kb KO fragments of <i>C. albicans</i> <i>YAF9</i> and <i>hisG-URA3-hisG</i> in pBluescript SK(+)                                         | This study    |
| pBDF1-KO            | 0.56 kb and 0.53 kb KO fragments of <i>C. albicans</i> <i>BDF1</i> and <i>hisG-URA3-hisG</i> in pBluescript SK(+)                                         | This study    |
| pHTZ1-KO            | 0.50 kb and 0.50 kb KO fragments of <i>C. albicans</i> <i>HTZ1</i> and <i>hisG-URA3-hisG</i> in pBluescript SK(+)                                         | This study    |
| pPR671              | <i>C. albicans</i> <i>ACT1</i> promoter, 13×myc-FLAG, <i>HIS1</i> , for gene expression under <i>ACT1</i> promoter control at <i>RP10</i> locus in genome | <sup>4</sup>  |
| p671-ARG4           | <i>C. albicans</i> <i>ACT1</i> promoter, 13×myc-FLAG, <i>ARG4</i>                                                                                         | <sup>3</sup>  |
| pPR673              | <i>C. albicans</i> <i>ACT1</i> promoter, 13×myc-FLAG, <i>URA3</i>                                                                                         | <sup>4</sup>  |
| p671-YAF9           | 1.42 kb containing 5' region and ORF of <i>YAF9</i> in p671, for <i>YAF9-MYC</i> expression from its own promoter at <i>YAF9</i> locus                    | This study    |
| p673-YAF9           | 1.42 kb containing 5' region and ORF of <i>YAF9</i> in p673                                                                                               | This study    |
| p671-ARG4-YAF9      | 1.42 kb containing 5' region and ORF of <i>YAF9</i> in p671-ARG4                                                                                          | This study    |
| p671-EAF1           | 3.4 kb containing 5' region and ORF of <i>EAF1</i> in p671                                                                                                | This study    |
| p673-EAF1           | 3.4 kb containing 5' region and ORF of <i>EAF1</i> in p673                                                                                                | This study    |
| p671-ARG4-EAF1      | 3.4 kb containing 5' region and ORF of <i>EAF1</i> in p671-ARG4                                                                                           | This study    |
| p671-SWR1           | 5.4 kb containing 5' region and ORF of <i>SWR1</i> in p671                                                                                                | This study    |
| p673-SWR1           | 5.4 kb containing 5' region and ORF of <i>SWR1</i> in p673                                                                                                | This study    |
| p671- ARG4-SWR1     | 5.4 kb containing 5' region and ORF of <i>SWR1</i> in p671-ARG4                                                                                           | This study    |
| p671-ESA1           | 2.18 kb containing 5' region and ORF of <i>ESA1</i> in p671                                                                                               | This study    |
| p673-ESA1           | 2.18 kb containing 5' region and ORF of <i>ESA1</i> in p673                                                                                               | This study    |
| p671- ARG4-ESA1     | 2.18 kb containing 5' region and ORF of <i>ESA1</i> in p671-ARG4                                                                                          | This study    |
| P673-HDA1           | 2.5 kb containing 5' region and ORF of <i>HDA1</i> in p673                                                                                                | This study    |
| pBES116             | <i>C. albicans</i> <i>URA3</i> vector for integration at <i>ADE2</i> locus in genome                                                                      | <sup>6</sup>  |
| pBES116-YAF9        | 0.765 kb full length <i>YAF9</i> in pBES116 for <i>YAF9</i> expression from its own promoter at <i>YAF9</i> locus                                         | This study    |
| pBES116-YAF9 dYEATS | 0.549 kb <i>Yaf9</i> fragment lacking YEATS domain in pBES116                                                                                             | This study    |

|                 |                                                                                                                                                                                                                    |            |
|-----------------|--------------------------------------------------------------------------------------------------------------------------------------------------------------------------------------------------------------------|------------|
| pBES116-EAF1    | 2.06 kb full length <i>EAF1</i> in pBES116 for <i>EAF1</i> expression from its own promoter                                                                                                                        | This study |
| pEAF1 muts      | <i>Eaf1</i> <sup>K173R</sup> , <i>Eaf1</i> <sup>K173Q</sup> , <i>Eaf1</i> <sup>K173A</sup> , <i>Eaf1</i> <sup>K173H</sup> , <i>Eaf1</i> <sup>K173N</sup> and <i>Eaf1</i> <sup>K489R</sup> mutation in pBES116-EAF1 | This study |
| pBES116-ESA1    | 2.18 kb <i>ESA1</i> in pBES116 for <i>ESA1</i> expression from its own promoter                                                                                                                                    | 3          |
| pEAF1-YAF9      | <i>EAF1</i> and <i>YAF9</i> fusion fragment in pBES116 for <i>Eaf1</i> - <i>Yaf9</i> fusion expression from <i>EAF1</i> promoter                                                                                   | This study |
| pBA1            | <i>C. albicans ADH1</i> promoter in BES116,                                                                                                                                                                        | 7          |
| pBA1-YAF9       | for gene expression under <i>ADH1</i> promoter control at <i>ADE2</i> locus                                                                                                                                        |            |
| pBA1-YAF9       | 0.765 kb full length <i>YAF9</i> in pBA1 for <i>YAF9</i> expression from <i>ADH1</i> promoter                                                                                                                      | This study |
| pEaf1-myc       | <i>Eaf1</i> -Myc fusion in pBA1                                                                                                                                                                                    | This study |
| pEaf1-myc muts  | Lysine to arginine substitution at K173, K447, K478, K481, K482, K489 and K552 in pEaf1-myc                                                                                                                        | This study |
| pEsa1-myc       | <i>Esa1</i> -Myc fusion in pBA1                                                                                                                                                                                    | This study |
| pEsa1-K296R-myc | Lysine to arginine substitution at K296 in pEsa1-myc                                                                                                                                                               |            |
| pEsa1-HA        | <i>Esa1</i> with 3HA at C-terminus from its own promoter, <i>URA3</i>                                                                                                                                              | This study |
| pSwr1-HA        | <i>Swr1</i> with 3HA at C-terminus from its own promoter, <i>URA3</i>                                                                                                                                              | This study |
| pYaf9-HA        | <i>Yaf9</i> with 3HA at C-terminus from its own promoter, <i>URA3</i>                                                                                                                                              | This study |
| pEaf1-HA        | <i>Eaf1</i> with 3HA at C-terminus from its own promoter, <i>URA3</i>                                                                                                                                              | This study |
| pEaf1-HA muts   | <i>Eaf1</i> <sup>K173R</sup> , <i>Eaf1</i> <sup>K173Q</sup> , <i>Eaf1</i> <sup>K173A</sup> and <i>Eaf1</i> <sup>K489R</sup> mutation in pEaf1-HA                                                                   | This study |
| pHda1-HA-URA    | <i>Hda1</i> with 3HA at C-terminus from its own promoter, <i>URA3</i>                                                                                                                                              | This study |
| pHda1-HA-HIS    | <i>Hda1</i> with 3HA at C-terminus from its own promoter, <i>HIS1</i>                                                                                                                                              | This study |
| pGST-Eaf1       | 2.06 kb full length <i>EAF1</i> in pGEX-4T1 for GST- <i>Eaf1</i> expression in <i>E. coli</i>                                                                                                                      | This study |
| pGST-Eaf1 muts  | <i>Eaf1</i> <sup>K173R</sup> and <i>Eaf1</i> <sup>K173Q</sup> mutation in pGST-Eaf1                                                                                                                                | This study |
| pMBP-Yaf9       | 0.765 kb full length <i>YAF9</i> in pSJ8 for MBP- <i>Yaf9</i> expression in <i>E. coli</i>                                                                                                                         | This study |
| pMBP-dYEATS     | 0.549 kb <i>Yaf9</i> fragment lacking YEATS domain in pSJ8                                                                                                                                                         | This study |
| pMBP-YEATS      | 0.218 kb <i>Yaf9</i> fragment containing YEATS domain in pSJ8                                                                                                                                                      | This study |

---

**Table S3. Primers used in this study**

| Primers | Sequence                                                                                          | Purpose and features         |
|---------|---------------------------------------------------------------------------------------------------|------------------------------|
| F1      | 5'- ATTAGTAACACATCCCTCTCATATACCGCAATGGAGACCAG<br>AAAATTTGGAAGACGGCAA <u>gtttccagtcacgacgtt</u>    | KO <i>SWR1</i> by PCR method |
| R1      | 5'- AACTTACCAAAGTAATCTGTAGTAACTCTCCCTCTTGAATA<br>ACAACGTTATCCAACCTGT <u>gtggaattgtgagcggata</u>   |                              |
| F2      | 5'- tgca agatct ctgcag CTGCAGGAAAAGTATCCGTA                                                       | pSWR1-KO-5' region           |
| R2      | 5'- tgca agatct GCTGGCTGGTTCGTTTCCCA                                                              |                              |
| F3      | 5'- cgat gcatcc GACTAGAAATACAGTGGCCA                                                              | pSWR1-KO-3' region           |
| R3      | 5'- cgat gcatgc ctgcag GTTCAAGTACACAACGTGCT                                                       |                              |
| F4      | 5'-GTGGCGAAATACTTGGCACAGTCTCTAAAACACATACGCCA<br>ACCCAATGCCAAACACCA <u>gtttccagtcacgacgtt</u>      | KO <i>EAF1</i> by PCR method |
| R4      | 5'-AAAGAAATACAACGCCACCGAAATGGACCCGCCACAACCGC<br>AACTATGAAAAGAAGTTT <u>gtggaattgtgagcggata</u>     |                              |
| F5      | 5'- tgca agatct ctgcag CCAACCCTGCAAACCTCTAA                                                       | pEAF1-KO-5' region           |
| R5      | 5'- tgca agatctGGTTTGGTTAAGAAGAAGAAG                                                              |                              |
| F6      | 5'- cgat gcatccGTCAGACAACGACCTTAAACA                                                              | pEAF1-KO-3' region           |
| R6      | 5'- cgat gcatgc ctgcagCTAACGGATAGTCTTGGGGGC                                                       |                              |
| F7      | 5'- CCAATGGTATAGATAGAGATGTTTTAAAGTAATAGGTAATTA<br>GGATATGCAAATATAAA <u>gtttccagtcacgacgtt</u>     | KO <i>YAF9</i> by PCR method |
| R7      | 5'- CCCATGAATGATGATAGCACTAGTTCTAGTTCTAGTTCTAGTT<br>CTAGTTGTTATTTAA <u>gtggaattgtgagcggata</u>     |                              |
| F8      | 5'-tgca <u>agatct ctgcag</u> GATAGAGATGTTTTAAAGTAA                                                | pYAF9-KO-5' region           |
| R8      | 5'-tgca <u>agatct</u> GAATGAGTTGATGACATGGAT                                                       |                              |
| F9      | 5'-cgat gcatcc GAAAAATTAGCCCTCTACAA                                                               | pYAF9-KO-3' region           |
| R9      | 5'-cgat <u>gcatgc ctgcag</u> GCACTAGTTCTAGTTCTAGTT                                                |                              |
| F10     | 5'-CCATCAATTTATAATCTTTAATTAATAATTTAGAAAAAATCCCT<br>TTCTCATCAAACCTGG <u>gtttccagtcacgacgtt</u>     | KO <i>BDF1</i> by PCR method |
| R10     | 5'GTCTCTCGTTTTTGTGGAATCTTCGGAGTTTTGAAACCTTAAGCT<br>TTTTTTTTTAATTT <u>gtggaattgtgagcggata</u>      |                              |
| F11     | 5'- tgca agatct ctgcag GCTTGTTAAGAATGCTATCA                                                       | pBDF1-KO-5' region           |
| R11     | 5'- tgca agatct GATGTGAACCTTTGTTGGTTA                                                             |                              |
| F12     | 5'- cgat gcatcc GGTCAGCAAGGGTCCGACAA                                                              | pBDF1-KO-3' region           |
| R12     | 5'- cgat gcatgc ctgcag GGTTAATTGTTGTTTATCTA                                                       |                              |
| F13     | 5'- CCAAATTATTGCACTGGACACCACCTCTGTTCACTGCAAAC<br>CAATTACGGTTTGGGTGG <u>CGCGGTGGCGGCCGCATCTTT</u>  | Endogenous <i>Esal</i> -HA   |
| R13     | 5'- CGATAAAAGTATTAGAATATGGGGAACATCCTATTAATATA<br>TATCTATATATATATTTA <u>AGGGGGATCCACTAGTTCTAGA</u> |                              |
| F14     | 5'-GATGGCATTGGTCACATTGATGAGTATATGTTACGGTTTATTT<br>CGGATGGATATTATTTA <u>CGCGGTGGCGGCCGCATCTTT</u>  | Endogenous <i>Swr1</i> -HA   |
| R14     | 5'-GCAAGAGATTTTTATAAAAGAAAGGCCATTGCTTAATAT<br>GTAATACAAGGAGTAACTA <u>AGGGGGATCCACTAGTTCTAGA</u>   |                              |
| F15     | 5'- ATGTCATCAACTCATTCAAGAAGAATAAAATTTGTATCGATAT<br>CAGTACCTATATTATAT <u>CGCGGTGGCGGCCGCATCTTT</u> | Endogenous <i>Yaf9</i> -HA   |

|     |                                                                                                    |                       |
|-----|----------------------------------------------------------------------------------------------------|-----------------------|
| R15 | 5'-TTATTGTAGGAGGGCTAATTTTTCTTGTTTCGAGTAATTTATATTG<br>ATTTTCGTTGATTTTC <u>GGGGGATCCACTAGTTCTAGA</u> |                       |
| F16 | 5'- ATGAACGATACTTGGAGGTCTCGATTAAAGGAGATTCTGCATA<br>TCACTGCAGACCCATTCCGCGGTGGCGGCCGCATCTTT          | Endogenous Eaf1-HA    |
| R16 | 5'-CTACTTACGCGTTGTTTGGCGACCCTGACATGGGCGATGCAGTT<br>TGGTTTTTTTTGGTGTG <u>GGGGGATCCACTAGTTCTAGA</u>  |                       |
| F17 | 5'- gct ggatec GACGAAAATTTTTCTTGATA                                                                | Endogenous Esa1-myc   |
| R17 | 5'- ggag acgcgt cg GATAATGGCTTTTCTGGCGAA                                                           |                       |
| F18 | 5'- gct ggatec GAGATGAGTATAATACAATCA                                                               | Endogenous Swr1-myc   |
| R18 | 5'- ggag acgcgt cg TAAATAATATCCATCCGAAATA                                                          |                       |
| F19 | 5'- gct ggatec TTGATGAAAAATTATCTACTC                                                               | Endogenous Yaf9-myc   |
| R19 | 5'- ggag acgcgt cgTTGTAGGAGGGCTAATTTTTCT                                                           |                       |
| F20 | 5'- gct ggatec GACAATACCAACGACGAAGA                                                                | Endogenous Eaf1-myc   |
| R20 | 5'- ggag acgcgt cg CGCGTTGTTTGGCGACCCTGA                                                           |                       |
| F21 | 5'-gat gcgccgc GACAATACCAACGACGAAGACA                                                              | pBES116-EAF1          |
| R21 | 5'-gat ggtacc TTACGCGTTGTTTGGCGACCC                                                                |                       |
| F22 | 5'-gat gcgccgc TTGATGAAAAATTATCTACTC                                                               | pBES116-YAF9          |
| R22 | 5'-gat ggtaccTCATGTAGGAGGGCTAATTTTTCT                                                              |                       |
| F23 | 5'-GTGACATTTAAATTACATGAACTTATGAAAATCCA                                                             | pBES116-YAF9 dYEATS   |
| R23 | 5'-ATGTAATTTAAATGTCACCTTGAATGAGTTGATGACAT                                                          |                       |
| F24 | 5'-gat gcgccgcGACAATACCAACGACGAAGACA                                                               | pEAF1-YAF9            |
| R24 | 5'- TCAGGGTCGCCAAACAACGCG ATGTCATCAACTCATTCAAGA                                                    |                       |
| F25 | 5'-TCTTGAATGAGTTGATGACATCGCGTTGTTTGGCGACCCTGA                                                      |                       |
| R25 | 5'-gatggtaccTCATGTAGGAGGGCTAATTTTTCT                                                               |                       |
| F26 | 5'-ACAGTCTGCCAGACTTCATCTGCTCTCCATTGACG                                                             | Hda1-HA               |
| R26 | 5'-CTGACTGACTGACTGCTGGTGGAAAGTTTCAAAGCA                                                            |                       |
| F27 | 5'-CTTGCCTTACCTCGGTTTAAAAAATAAAAGAACGAGCCTA                                                        |                       |
| R27 | 5'-TGTGTACGAGTTGCAATCTTCGGAAGAGGAGTAGTCTTCA                                                        |                       |
| F28 | 5'-GTATGGCAAGAGACCATCAAACG                                                                         |                       |
| R28 | 5'-TCAGCACAGGGATATGGGAAGTA                                                                         |                       |
| F29 | 5'- gct ggatec TTATAGAGAAGAATGACTCA                                                                | Hda1-Myc              |
| R29 | 5'- ggag acgcgt cgATCTTCGGAAGAGGAGTAGT                                                             |                       |
| F30 | 5'-gatc agatct ATGGCGGTAGCAGAAATCAAA                                                               | pBA1-YAF9             |
| R30 | 5'-gatc <u>atcgat</u> TTACCACCCAAACCGTAATTG                                                        |                       |
| F31 | 5'-CAGTCAGTCAGTCAGGATAACGCAGGAAAGAACAT                                                             | PUC18 backbone        |
| R31 | 5'-AGTCTGGCAGACTGTCTTAAGGGATCCAAGCTTCCC<br>GGGTTCTTAGACGTCAGGTGGCA                                 |                       |
| F32 | 5'-TGCAACTCGTACACAAGCGCGCAATTAGATCCGTG                                                             | URA3 amplification    |
| R32 | 5'-CCGAGGTAAGGCAAGTTCTTTCCTGCGTTATCCTG                                                             |                       |
| F33 | 5'-gatgaattcATGTCATCAACTCATTCAAGA                                                                  | pMBP-Yaf9             |
| R33 | 5'-gatctcgagTCATGTAGGAGGGCTAATTTTTCT                                                               |                       |
| F34 | 5'-gctggatccATGAACGATACTTGGAGGTCT                                                                  | pGST-Eaf1             |
| R34 | 5'-ggagacgcgtctaGTTGTTTGGCGACCCTGACAT                                                              |                       |
| F35 | 5'-CCAGTACTTCTGGATCATC                                                                             | <i>HWPI</i> , qRT PCR |

|     |                              |                            |
|-----|------------------------------|----------------------------|
| R35 | 5'-TCGGTACAAACACTGTTAGA      |                            |
| F36 | 5'-TGGTGTTCGCGTGGTCATTG      | <i>EAF1</i> , qRT PCR      |
| R36 | 5'-ATCGGTGGTTCTCTGGAGTC      |                            |
| F37 | 5'-GCTCAGTACCTCGCCAGTT       | <i>EAF1-YAF9</i> , qRT PCR |
| R37 | 5'-GTTCTGGTGGTGTGTTGGTT      |                            |
| F38 | 5'-GCTTTTGGTGTGTTGACGAGTTTCT | <i>ACT1</i> , qRT PCR      |
| R38 | 5'-GTGAGCCGGGAAATCTGTATAGTC  |                            |

---

## Reference

1. Fonzi, W. A., Irwin, M. Y. Isogenic strain construction and gene mapping in *Candida albicans*. *Genetics* 1993; **134**:717-728.
2. Wilson, R. B., Davis, D., Mitchell, A. P. Rapid hypothesis testing with *Candida albicans* through gene disruption with short homology regions. *J. Bacteriol.* 1999; **181**:1868-1874.
3. Wang, X., Chang, P., Ding, J., Chen, J. Distinct and redundant roles of the two MYST histone acetyltransferases Esa1 and Sas2 in cell growth and morphogenesis of *Candida albicans*. *Eukaryot. Cell* 2013; **12**:438-449.
4. Lu, Y. *et al.* Efg1-mediated Recruitment of NuA4 to Promoters Is Required for Hypha-specific Swi/Snf Binding and Activation in *Candida albicans*. *Mol. Biol. Cell* 2008; **19**:4260-4272.
5. Homann, O. R., Dea, J., Noble, S. M., Johnson, A. D. A phenotypic profile of the *Candida albicans* regulatory network. *PLoS Genet.* 2009; **5**:e1000783.
6. Feng, Q., Summers, E., Guo, B., Fink, G. Ras signaling is required for serum-induced hyphal differentiation in *Candida albicans*. *J. Bacteriol.* 1999; **181**:6339-6346.
7. Cao, F. *et al.* The Flo8 transcription factor is essential for hyphal development and virulence in *Candida albicans*. *Mol. Biol. Cell* 2006; **17**:295-307.
